# Supplementary material for: Direct observation of an intramolecular charge transfer state in epigenetic nucleobase N6-methyladenine
Source: Royal Society of Chemistry journal article supplement (doi:10.1039/c9cp00325h), 2019-01-01
Supplement: c9cp00325h1.pdf [file c9cp00325h1.pdf]

**Supplementary information for:**

**Direct Observation of Intramolecular Charge Transfer State  
in Epigenetic Nucleobase N6-methyladenine**

Zhongneng Zhou<sup>1</sup>, Xueli Wang<sup>1</sup>, Jinqian Chen<sup>1,2\*</sup> and Jianhua Xu<sup>1,2</sup>

1. State Key Laboratory of Precision Spectroscopy, East China Normal University,  
Shanghai 200062, China
2. Collaborative Innovation Center of Extreme Optics, Shanxi University, Taiyuan,  
Shanxi 030006, China

\*Corresponding author E-mail: [jqchen@lps.ecnu.edu.cn](mailto:jqchen@lps.ecnu.edu.cn)

## 1. Method to estimate the ground state equilibrium

The relative energies ( $\Delta E$  in eV) can be used to estimate the ground state contribution of trans and cis conformation at room temperature via the following equation:

$$P = e^{-\Delta E/k_B T} / Z \quad (1)$$

$$Z = \sum_n e^{-\Delta E/k_B T} \quad (2)$$

where  $P$  represents the percentage of a particular species.  $Z$  is the sum population of all possible species in the ground state.  $k_B$  and  $T$  represent the Boltzmann's constant in eV·K<sup>-1</sup> and temperature (298 K) respectively.<sup>1</sup> Song et al. have reported that the cis-form of 6MeAde is more stable than the trans-form by 12.44 kJ/mol based on their calculations.<sup>2</sup> Using equation (1) and (2), we estimated that the cis-6MeAde is exist in more than 99.4% in PBS buffer solution at room temperature.

## 2. Method to calculate the fluorescence quantum yield

The fluorescence quantum yields of 6MeAde in PBS buffer solution, D<sub>2</sub>O, acetonitrile and 6MeAdo in PBS buffer solution were measured using a comparing method. The equation below was used to calculate the fluorescence quantum yield.<sup>3,4</sup>

$$\Phi = \Phi_R \frac{I A_R n^2}{I_R A n_R^2}$$

where  $\Phi$  is the quantum yield,  $I$  is the measured fluorescence intensity,  $A$  represents the absorbance of the sample, and  $n$  represents the refractive index. Here, adenine was adopted as reference and its quantum yield is reported to be  $2.6 \times 10^{-4}$ .<sup>5</sup>

### **3. Method to evaluate the fitting results**

The corrected Akaike Information Criterion (AICc) is adopted to evaluate the fitting results.<sup>6</sup> Similar method has also been used before.<sup>7</sup> AICc is calculated according to the following equation:

$$AICc = N \ln\left(\frac{SS}{N}\right) + \frac{2KN}{N - K - 1}$$

In which  $N$  is the number of data points for fitting,  $SS$  represents the sum of square residuals, and  $K$  is the number of independently adjusted fitting parameters plus one.

Usually, the better fitting results would give a smaller AICc value.

#### 4. Additional experimental results

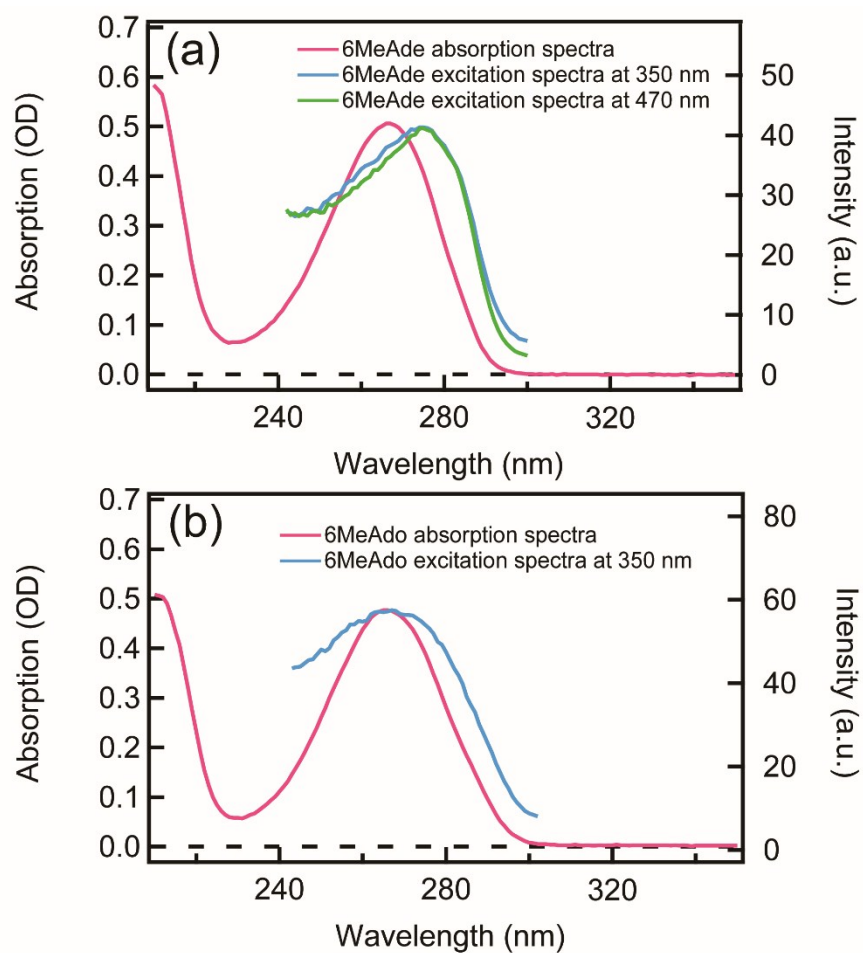

**Figure S1.** Steady state absorption and excitation spectra of 6MeAde (a) and 6MeAdo (b) in PBS buffer solution.

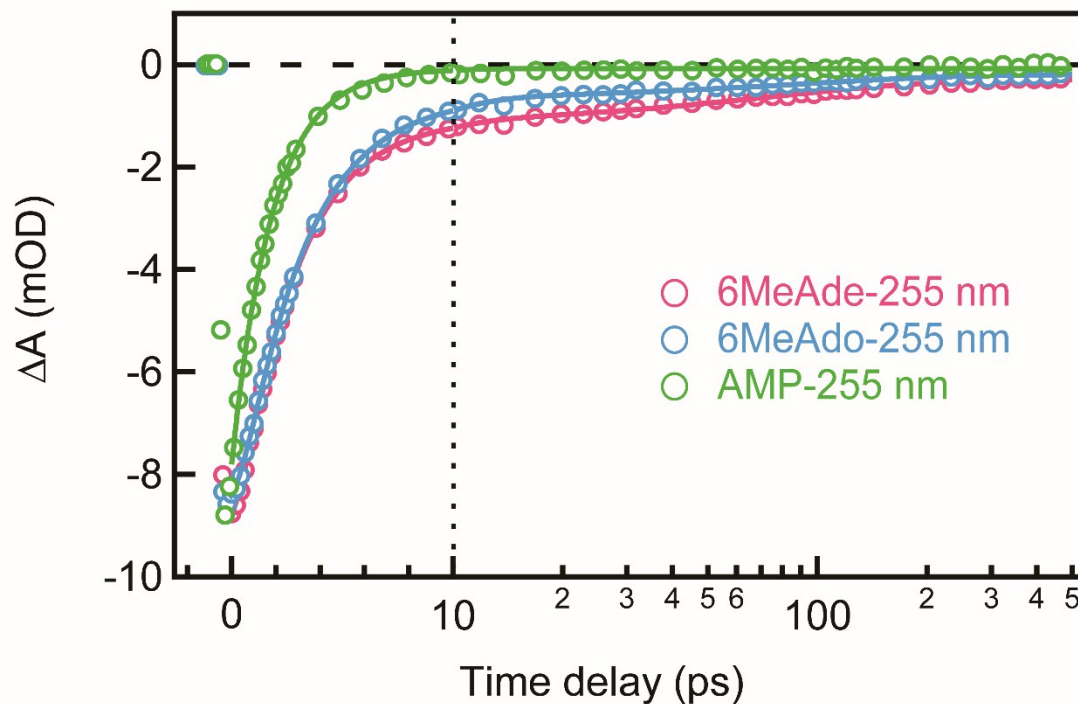

**Figure S2.** Transient absorption spectra at 255 nm for 6MeAde and 6MeAdo in PBS buffer solution.

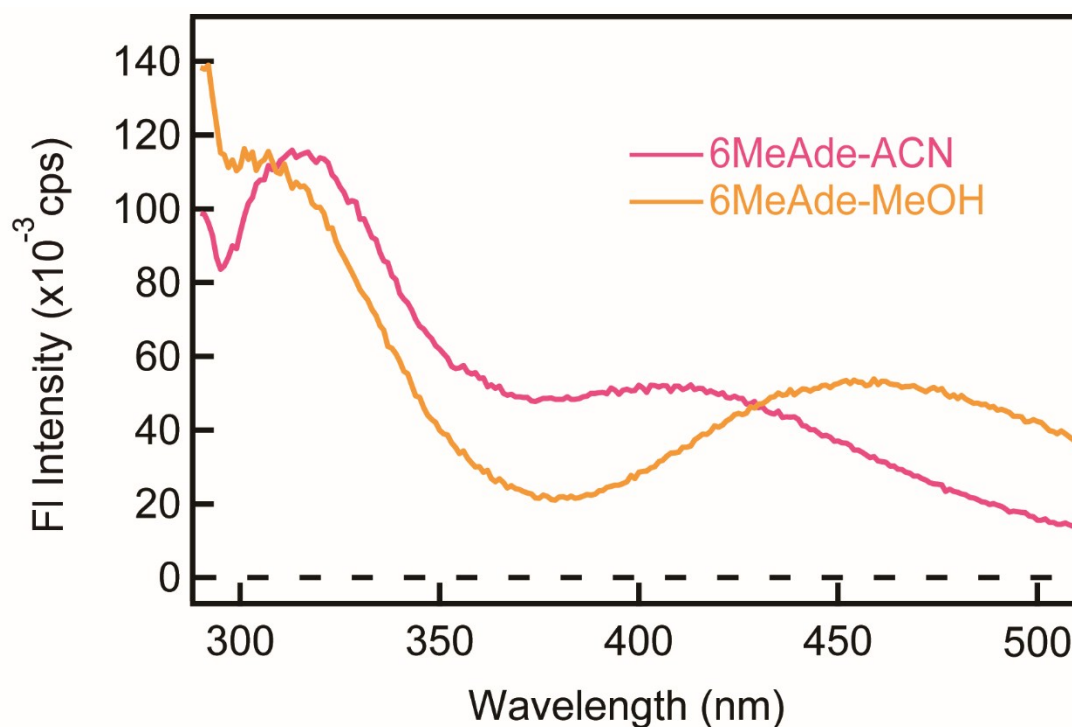

**Figure S3.** Steady state fluorescence spectra of 6MeAde in acetonitrile and methanol.

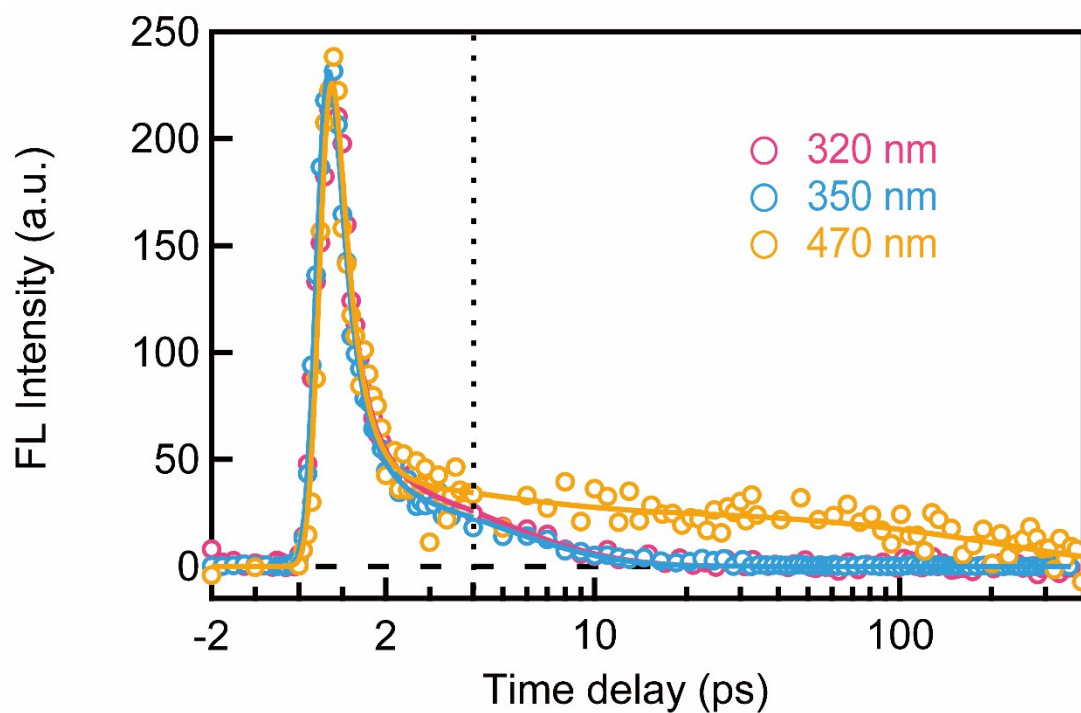

**Figure S4.** Fluorescence up-conversion spectra of 6MeAde in methanol.

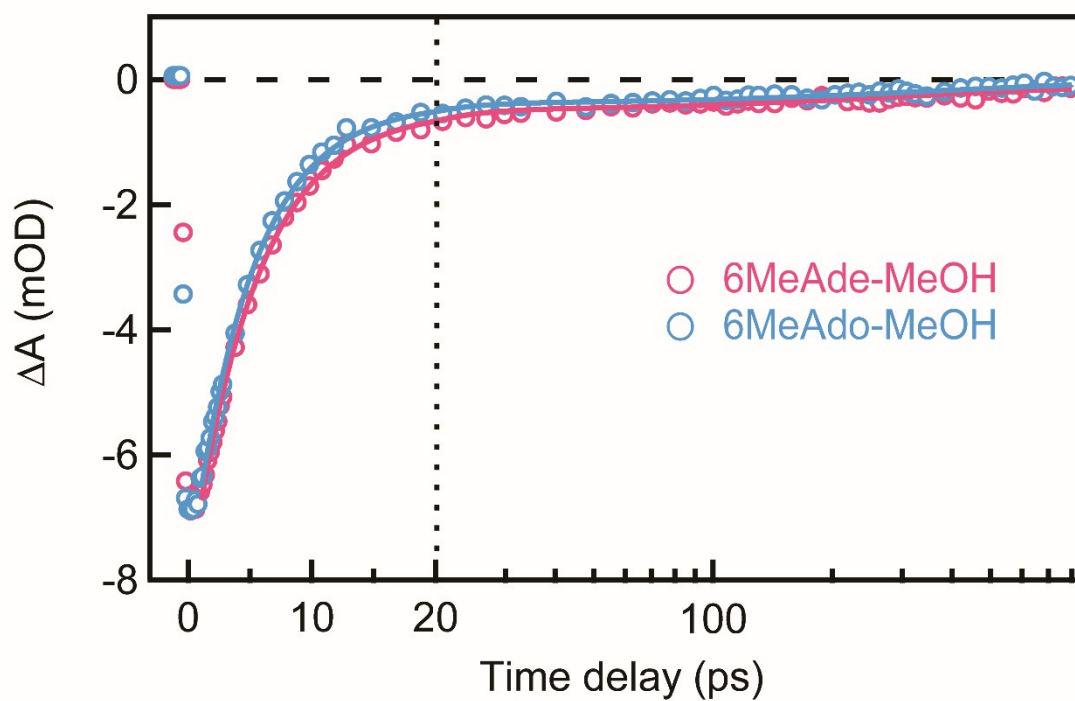

**Figure S5.** Transient absorption spectra at 255 nm for 6MeAde and 6MeAdo in methanol solution.

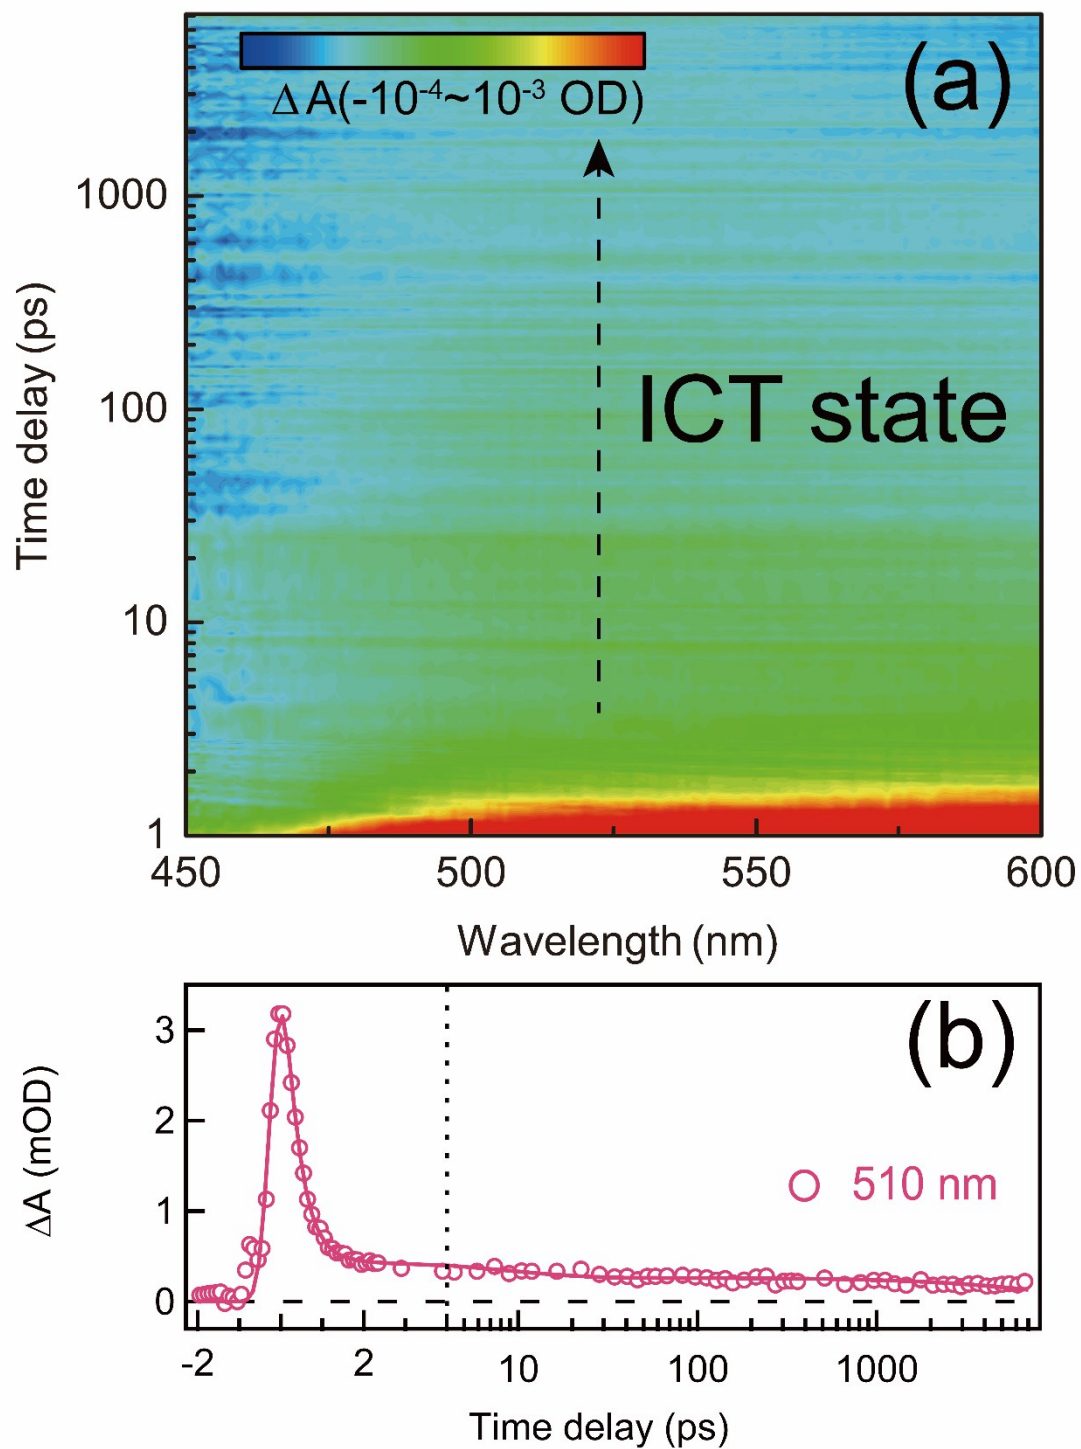

**Figure S6.** (a) Broadband transient absorption spectra of 6MeAde in acetonitrile. (b) Representative kinetic traces at 510 nm.

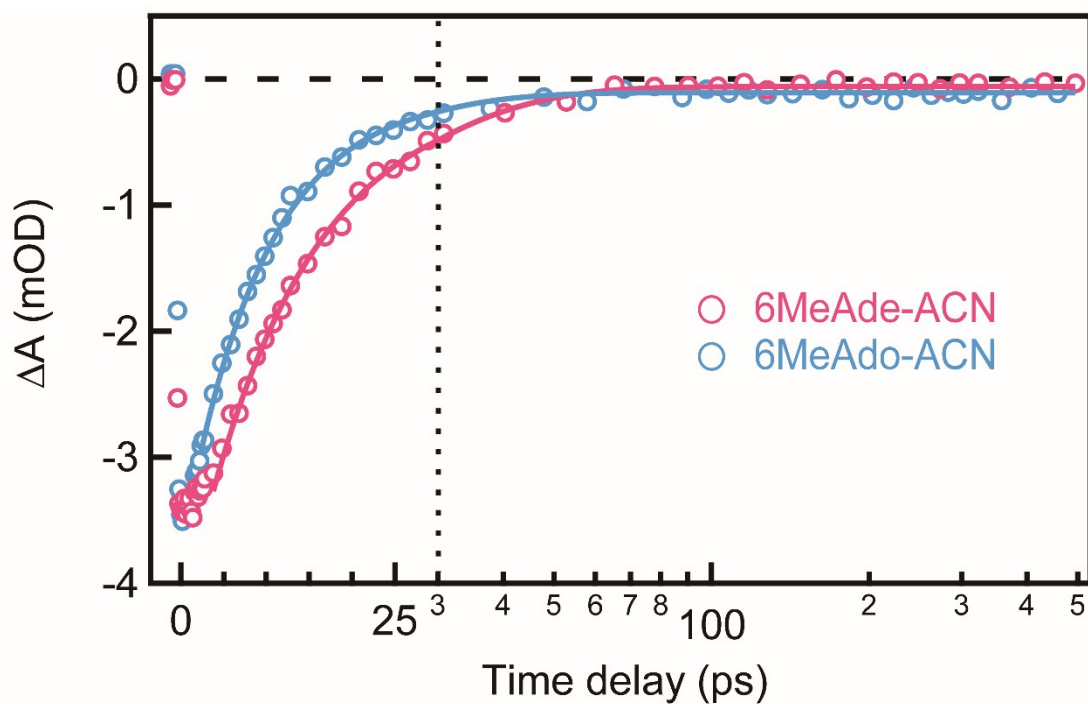

**Figure S7.** Transient absorption spectra at 255 nm for 6MeAde and 6MeAdo in acetonitrile solution.

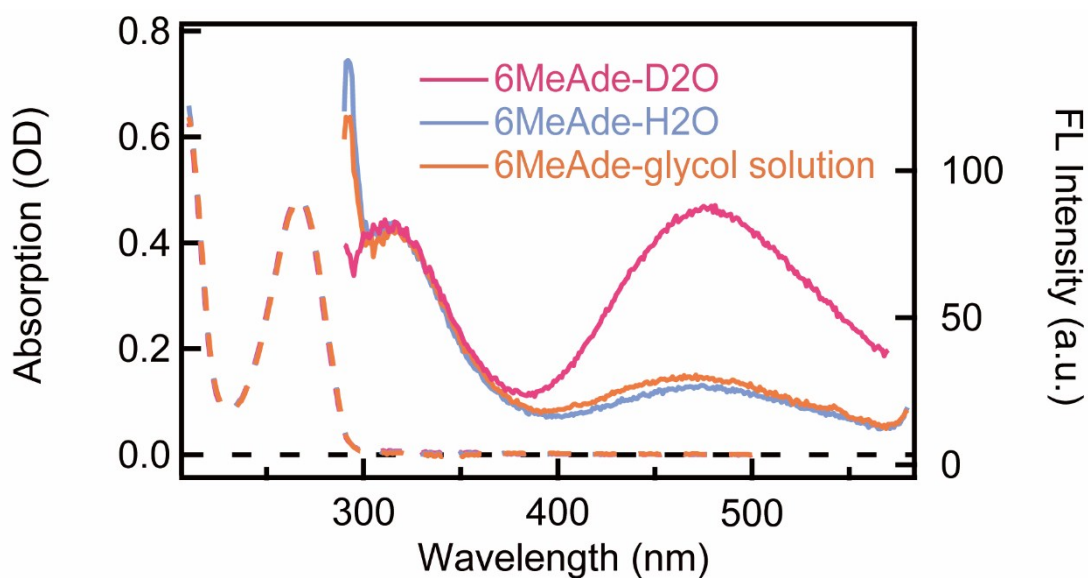

**Figure S8.** Steady state absorption (dash line) and emission spectra (solid line) of 6MeAde in D2O, H2O and glycol aqueous mixture solution.



**Table S1.** Fluorescence quantum yields of 6MeAde and 6MeAdo in PBS buffer, D<sub>2</sub>O, acetonitrile and methanol solutions.

|                          | $\Phi_{\text{Total}}$ ( $10^{-4}$ ) | $\Phi_{\text{LE}}$ ( $10^{-4}$ ) | $\Phi_{\text{ICT}}$ ( $10^{-4}$ ) |
|--------------------------|-------------------------------------|----------------------------------|-----------------------------------|
| Adenine-PBS <sup>a</sup> | 2.6                                 |                                  |                                   |
| 6MeAde-PBS               | 1.5                                 | 0.6                              | 0.9                               |
| 6MeAde-D2O               | 2.8                                 | 0.8                              | 2.0                               |
| 6MeAde-ACN               | 3.1                                 | 0.9                              | 2.2                               |
| 6MeAde-MeOH              | 1.9                                 | 0.7                              | 1.2                               |
| 6MeAdo-PBS               | 1.3                                 | 0.8                              | 0.5                               |

<sup>a</sup> The fluorescence quantum yield of adenine was taken from reference 5.

**Table S2.** Best-fit parameters for transient absorption traces of 6MeAde and 6MeAdo.<sup>a</sup>

|                           | $\lambda$ (nm) | $a_1$ (%) | $\tau_1$ (ps)   | $a_2$ (%) | $\tau_2$ (ps)  | $a_3$ (%) | $\tau_3$ (ps) | $a_4$ (%) |
|---------------------------|----------------|-----------|-----------------|-----------|----------------|-----------|---------------|-----------|
| 6MeAde in PBS<br>buffer   | 255            | -         | -               | -94%      | $2.5 \pm 0.1$  | -5%       | $75 \pm 5$    | -1%       |
|                           | 510            | 77%       |                 | 1%        |                | 13%       | $104 \pm 22$  | 9%        |
|                           | 680            | 85%       | $0.5 \pm 0.1$   | 10%       | $1.3 \pm 0.9$  | -         | -             | 5%        |
| 6MeAdo in PBS<br>buffer   | 255            | -         | -               | -96%      | $2.8 \pm 0.1$  | -3%       | $93 \pm 10$   | -1%       |
|                           | 510            | 65%       |                 | 31%       |                | -         | -             | 4%        |
|                           | 680            | 57%       | $0.6 \pm 0.2$   | 38%       | $1.5 \pm 0.6$  | -         | -             | 5%        |
| 6MeAde in<br>acetonitrile | 255            | -         | -               | -99%      | $13.0 \pm 0.3$ | -         | -             | -1%       |
|                           | 510            | 93%       | $0.34 \pm 0.04$ | 3%        | $8.9 \pm 6.8$  | -         | -             | 4%        |
| 6MeAdo in<br>acetonitrile | 255            | -         | -               | -96%      | $9.4 \pm 0.2$  | -         | -             | -4%       |
| 6MeAde in<br>methanol     | 255            | -93%      | $5.3 \pm 0.1$   | -         | -              | -5%       | $300 \pm 100$ | -2%       |
| 6MeAdo in<br>methanol     | 255            | -95%      | $4.9 \pm 0.1$   | -         | -              | -4%       | $387 \pm 190$ | -1%       |
| AMP in PBS                | 255            | -99%      | $1.8 \pm 0.1$   | -         | -              | -         | -             | -1%       |

<sup>a</sup> Amplitude percentage was calculated by  $A_i = A_i / \sum |A_n|$

**Table S3.** Fit parameters for up-conversion traces of 6MeAde in methanol.

|                       | $\lambda$ (nm) | $a_1$ (%) | $\tau_1$ (ps)   | $a_2$ (%) | $\tau_2$ (ps) | $a_3$ (%) | $\tau_3$ (ps) |
|-----------------------|----------------|-----------|-----------------|-----------|---------------|-----------|---------------|
| 6MeAde in<br>methanol | 320            | 86%       |                 | 14%       |               | -         | -             |
|                       | 350            | 88%       | $0.41 \pm 0.04$ | 12%       | $4.0 \pm 0.7$ | -         | -             |
|                       | 470            | 90%       |                 | 4%        |               | 6%        | $222 \pm 36$  |

## Reference

1. R. M. Discipio, R. Y. Santiago, D. Taylor and C. E. Crespo-Hernández, *Phys. Chem. Chem. Phys.*, 2017, **19**, 12720-12729.
2. Q. X. Song, Z. D. Ding, J. H. Liu, Y. Li and H. J. Wang, *J. Mol. Model.*, 2013, **19**, 1089-1098.
3. M. Li, S. K. Cushing, X. Zhou, S. Guo and N. Wu, *J. Mater. Chem.*, 2012, **22**, 23374-23379.
4. J. R. Lakowicz, *Principles of Fluorescence Spectroscopy.*, third ed., Springer: US, Boston, MA, 2006, pp. 27-61.
5. M. Pollum, L. Martínez-Fernández and C. E. Crespo-Hernández, *Top. Curr. Chem.*, 2015, **355**, 245-328.
6. K. P. Burnham and D. R. Anderson, *Model Selection and Multi-Model Inference. A Practical Information-Theoretic Approach.*, Second ed., Springer: New York, 2002.
7. J. Chen and B. Kohler, *J. Am. Chem. Soc.*, 2014, **136**, 6362-6372.
